# Supplementary material
Source: PubMed Central journal article supplement (PMC3570584)

**Figure caption.**

Figure S2. Mean eigenvariate values for veterans with PTSD and veterans without PTSD during (A) wakefulness and (B) REM sleep for selected brain regions where veterans with PTSD (grey bars) showed greater relative rCMRglc compared to veterans without PTSD (Non-PTSD; black bars). Error bars represent standard deviations.

Figure S3. Render images depicting brain regions where veterans with PTSD showed lower relative rCMRglc than control veterans without PTSD (CTL) during wakefulness (a) and rapid-eye movement (REM) sleep (b). Statistical maxima were identified in MNI (x, y, z) coordinates. The alpha level for significance was set at 0.05, with family-wise error (FWE) correction for multiple comparisons.

Supplementary Table 1. Mean self-report and polysomnographic (PSG) sleep measures for the two groups of combat-exposed military veterans on the baseline night.

|                                    | Veterans with PTSD          |       | Veterans without PTSD       |       | Statistics        | Cohen's <i>d</i><br>Effect Size |
|------------------------------------|-----------------------------|-------|-----------------------------|-------|-------------------|---------------------------------|
|                                    | (n = 6)                     |       | (n = 6)                     |       |                   |                                 |
|                                    | Mean                        | SD    | Mean                        | SD    | <i>t</i> (10)     |                                 |
| PTSD Severity                      |                             |       |                             |       |                   |                                 |
| Clinician Administered PTSD Scale  | 48.70                       | 18.30 | 11.20                       | 11.70 | 4.24 <sup>§</sup> | 2.44                            |
| Self-report sleep measures         |                             |       |                             |       |                   |                                 |
| Pittsburgh Sleep Quality Index     | 9.50                        | 3.70  | 2.30                        | 1.60  | 4.37 <sup>§</sup> | 2.53                            |
| PSQI Addendum for PTSD             | 3.00                        | 2.00  | 0.80                        | 1.60  | 2.07 <sup>§</sup> | 1.21                            |
| PSG sleep measures                 |                             |       |                             |       |                   |                                 |
| Sleep latency* (min)               | 14.17                       | 4.02  | 13.72                       | 11.78 | 0.09              | 0.05                            |
| Wake time after sleep onset* (min) | 29.89                       | 23.99 | 21.28                       | 10.96 | 0.80              | 0.46                            |
| Total sleep time (min)             | 430.34                      | 38.33 | 392.22                      | 38.18 | 1.73              | -0.99                           |
| Sleep efficiency* (%)              | 91.01                       | 4.24  | 91.70                       | 4.56  | 0.27              | 0.15                            |
| % Slow wave sleep*                 | 5.36                        | 3.00  | 10.68                       | 9.55  | 1.03 <sup>‡</sup> | 0.75                            |
| % REM Sleep                        | 30.06                       | 4.95  | 22.09                       | 5.35  | 2.68 <sup>§</sup> | 1.55                            |
| REM latency*                       | 74.39                       | 22.86 | 105.83                      | 68.69 | 1.06              | 0.61                            |
| REM density                        | 11.41                       | 4.57  | 6.50                        | 3.43  | 2.11 <sup>‡</sup> | 1.22                            |
| * Data normalized for analysis     | <sup>§</sup> <i>p</i> < .05 |       | <sup>‡</sup> <i>p</i> < .10 |       |                   |                                 |

Figure S2.

(A)

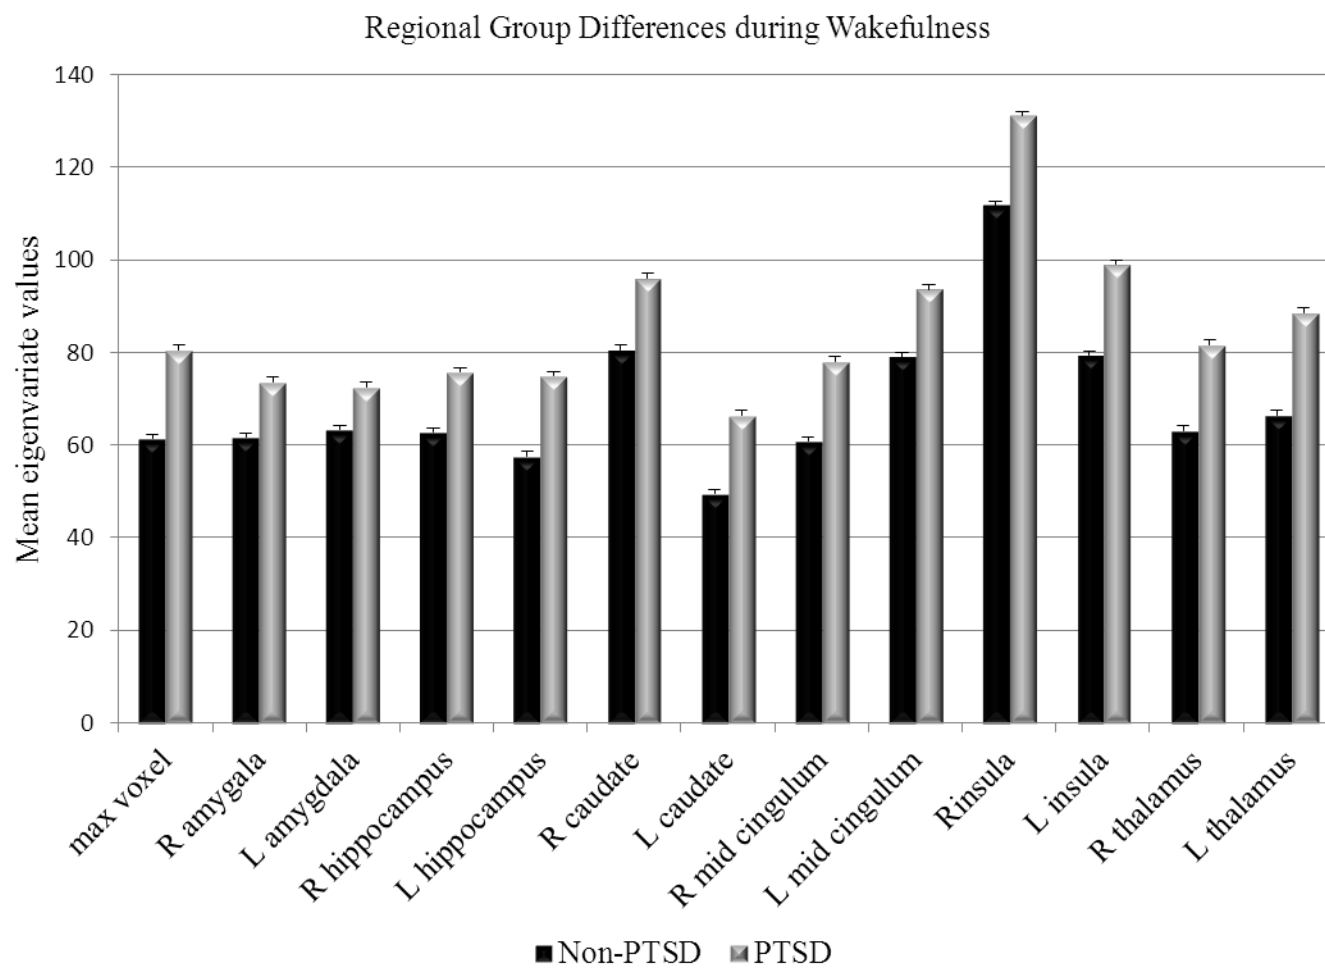

(B)

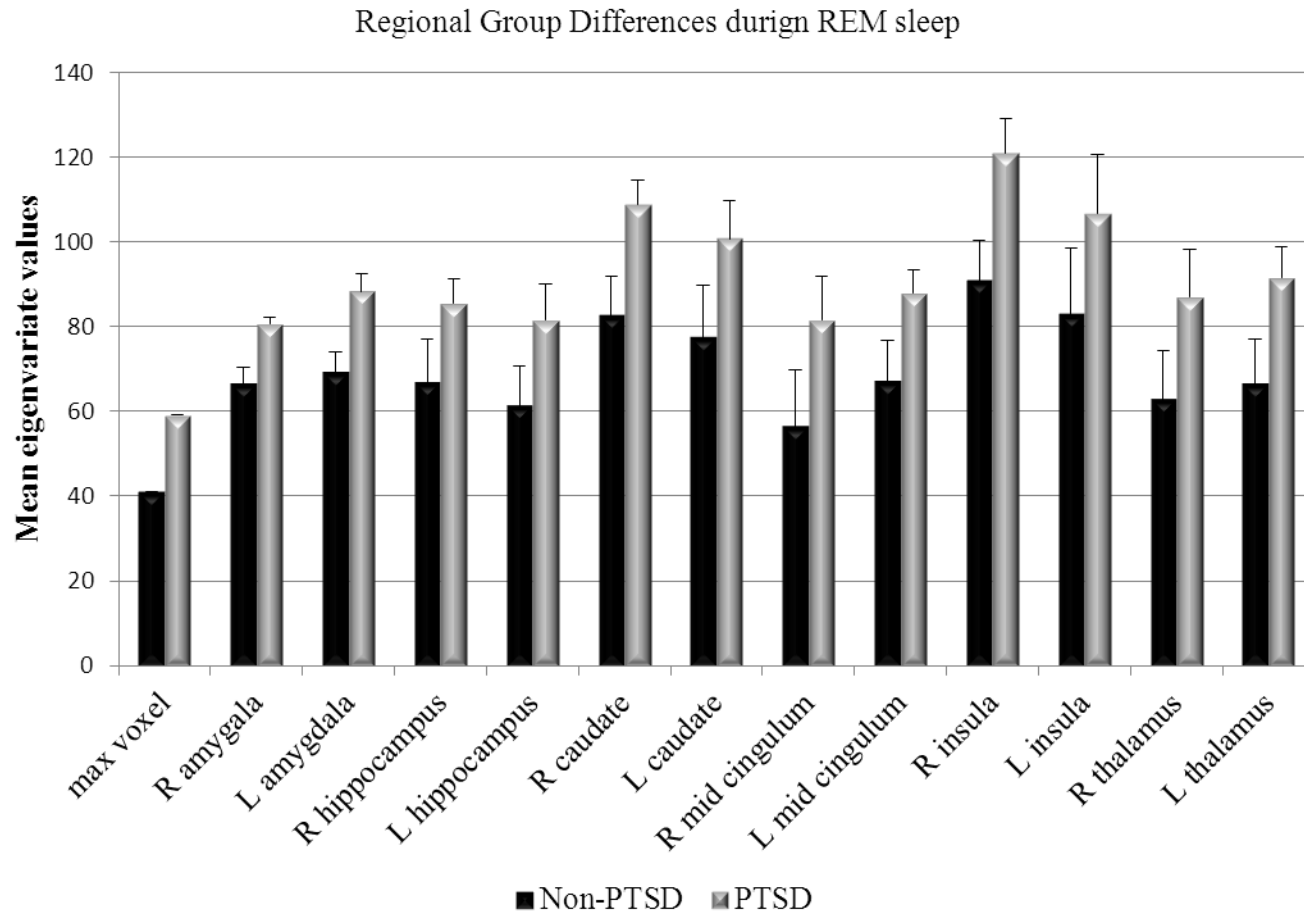

Figure S2.

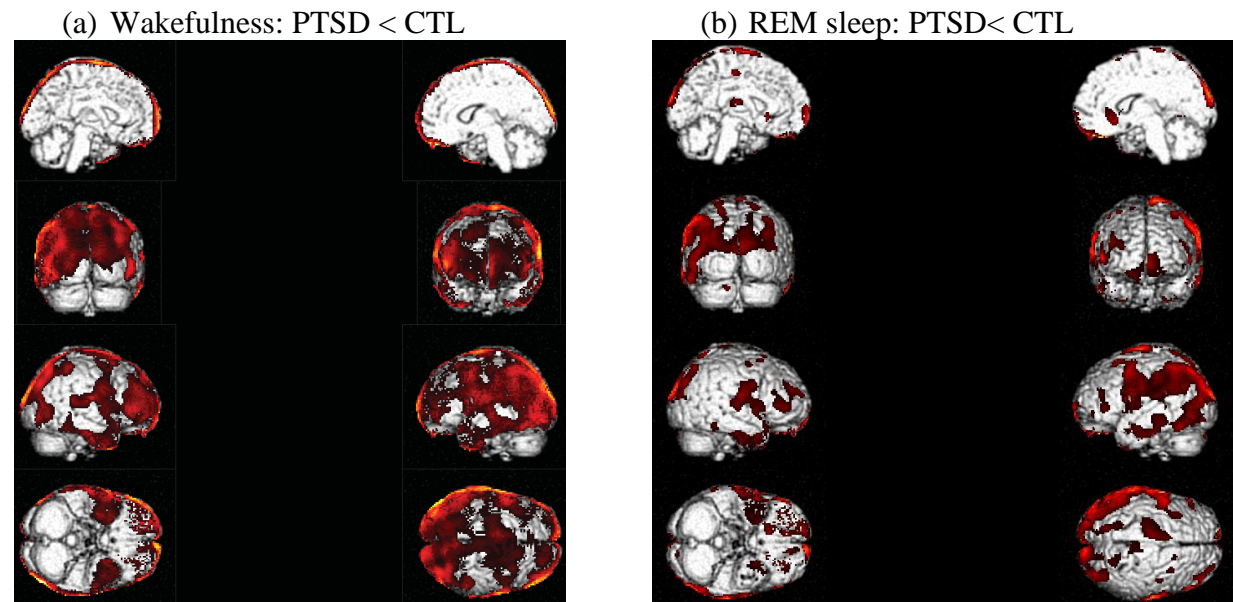

Supplement: NIHMS383168-supplement-01.pdf [file NIHMS383168-supplement-01.pdf]
